# Supplementary material
Source: HighWire-hosted journal article supplement (https://bmjopen.bmj.com/content/10/3/e033730)
Supplement: inline-supplementary-material-1 [file inline-supplementary-material-1.pdf]

## Appendix A

Table 1. Overview of the interview items relevant for the analyses in this publication.

| Topics                                   | Central questions                                                                                                                                                                                                                                                                                                                                                                                                                                                 |
|------------------------------------------|-------------------------------------------------------------------------------------------------------------------------------------------------------------------------------------------------------------------------------------------------------------------------------------------------------------------------------------------------------------------------------------------------------------------------------------------------------------------|
| <b>Introduction</b>                      | <ul style="list-style-type: none"> <li>Do you have any questions before we start the interview?</li> </ul>                                                                                                                                                                                                                                                                                                                                                        |
| <b>Sociodemographic and medical data</b> |                                                                                                                                                                                                                                                                                                                                                                                                                                                                   |
| <b>Return to daily life</b>              |                                                                                                                                                                                                                                                                                                                                                                                                                                                                   |
| Work life                                | <ul style="list-style-type: none"> <li>Which changes in your work life did you experience from your child's diagnosis until today?</li> <li>What were barriers and facilitators in your work life?</li> <li>If applicable: Which impact did the use of a rehabilitation measure had on your work life?</li> <li>How satisfied are you with your current job situation?</li> </ul>                                                                                 |
| Family life                              | <ul style="list-style-type: none"> <li>Which changes in your family life did you experience from your child's diagnosis until today?</li> <li>What were barriers and facilitators in your family life?</li> <li>If applicable: Which impact did the use of a rehabilitation measure had on your family life?</li> <li>How satisfied are you with your current family life?</li> </ul>                                                                             |
| Partner relationship                     | <ul style="list-style-type: none"> <li>Which changes in your partner relationship did you experience from your child's diagnosis until today?</li> <li>What were barriers and facilitators in your partner relationship?</li> <li>If applicable: Which impact did the use of a rehabilitation measure had on your partner relationship?</li> <li>How satisfied are you with your current partner relationship?</li> </ul>                                         |
| Social life                              | <ul style="list-style-type: none"> <li>Which changes in your social life (friends, leisure time activities) did you experience from your child's diagnosis until today?</li> <li>What were barriers and facilitators for participating in social life and leisure time activities?</li> <li>If applicable: Which impact did the use of a rehabilitation measure had on your social life?</li> <li>How satisfied are you with your current social life?</li> </ul> |
| <b>Closing the interview</b>             | <ul style="list-style-type: none"> <li>Is there anything you want to tell me that is important to you and we have not talked about?</li> </ul>                                                                                                                                                                                                                                                                                                                    |

Items were translated from German into English for the purpose of publication.
